# Supplementary material
Source: PubMed Central journal article supplement (PMC7117937)
Supplement: AEM.02759-19-s0001.pdf [file AEM.02759-19-s0001.pdf]

## Supplementary Materials

### Acidocalcisomes and Polyphosphate Granules Are Different Subcellular Structures in *Agrobacterium tumefaciens*

Celina Frank and Dieter Jendrossek

*Institute of Microbiology, University of Stuttgart, Germany*

**Key words:** Acidocalcisomes, polyphosphate, alpha-proteobacteria, polyphosphate kinase,

\*Correspondent footnote: Dieter Jendrossek  
Institut für Mikrobiologie  
Universität Stuttgart  
Allmandring 31  
70569 Stuttgart  
Germany  
Tel.: +49-711-685-65483  
Fax: +49-711-685-65725  
E-mail: [dieter.jendrossek@imb.uni-stuttgart.de](mailto:dieter.jendrossek@imb.uni-stuttgart.de)

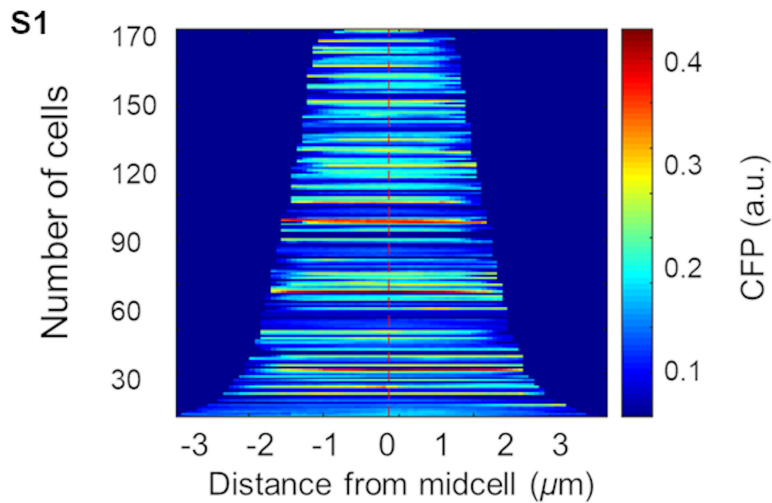

**Suppl. Materials, Fig. S1: Staining of *A. tumefaciens* with Lysosensor green DND-189.** The demograph shows the localization of Lysosensor green DND-189 fluorescence dependent on cell length. Note the absence of any fluorescent foci in all cells (n=170).

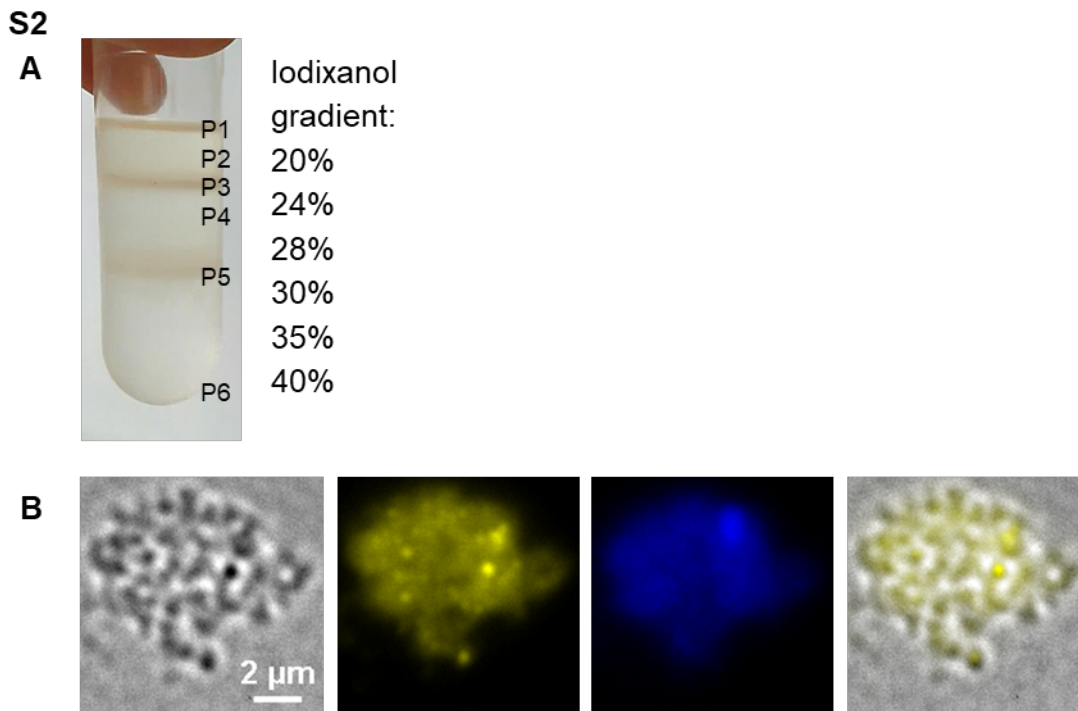

**Suppl. materials, Fig. S2: Iodixanol density gradient centrifugation of *A. tumefaciens* cell extracts.** Separate fractions as indicated (P1-P6) (A). Microscopical analysis of the bottom fraction P6 (B). The fraction P6 shows the presence of DAPI-polyP stainable structures. From left to right: bright field, DAPI-polyP, DAPI-DNA, merge of 1 and 2.

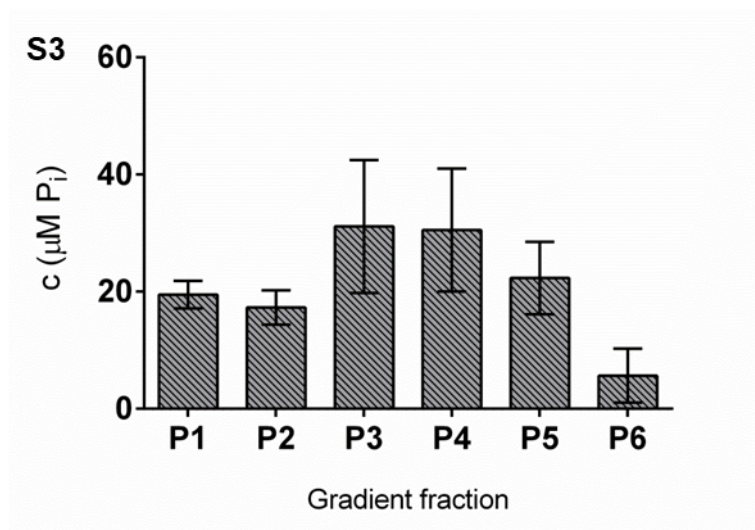

**Suppl. materials, Fig. S3: Determination of polyP content in iodixanol fractions P1-P6.** PolyP was digested with *E. coli* PPX and concentration of liberated phosphate (P<sub>i</sub>) was determined by malachite green assay.

S4

A

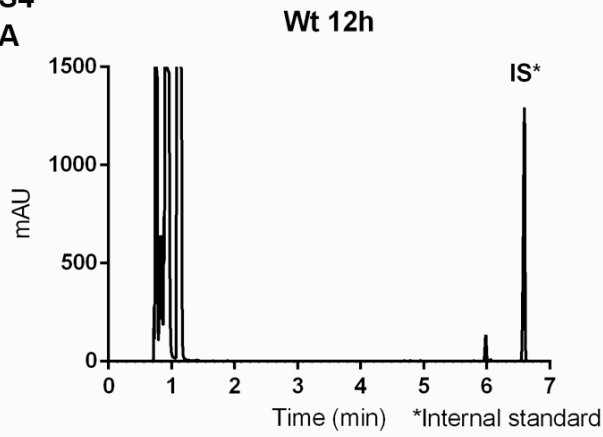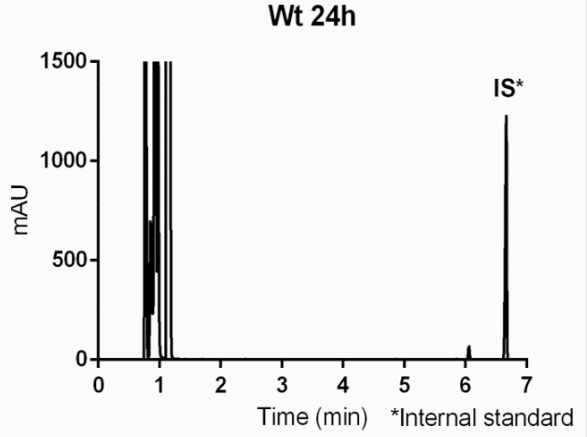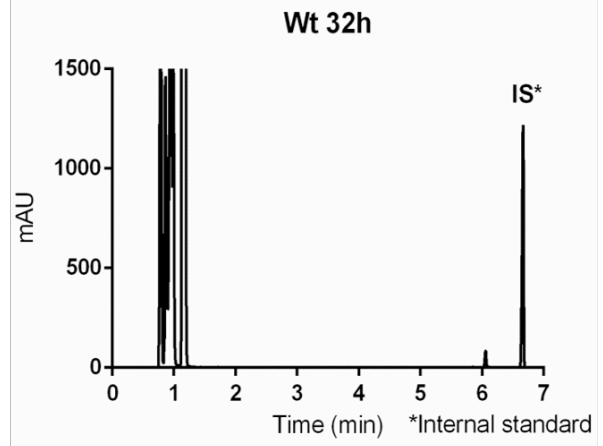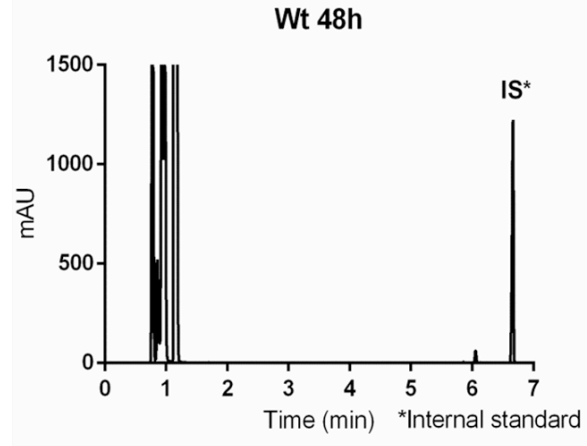

B

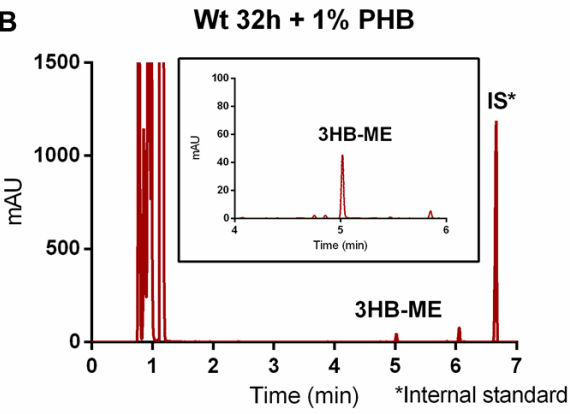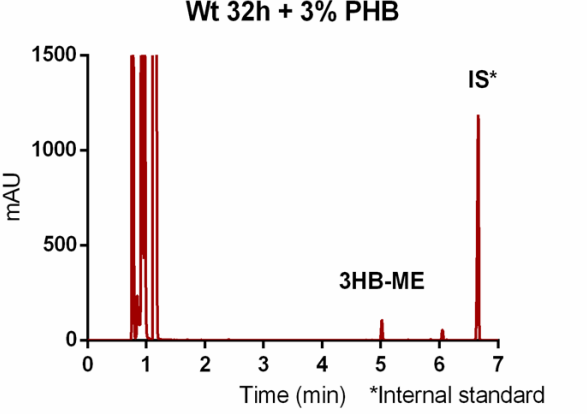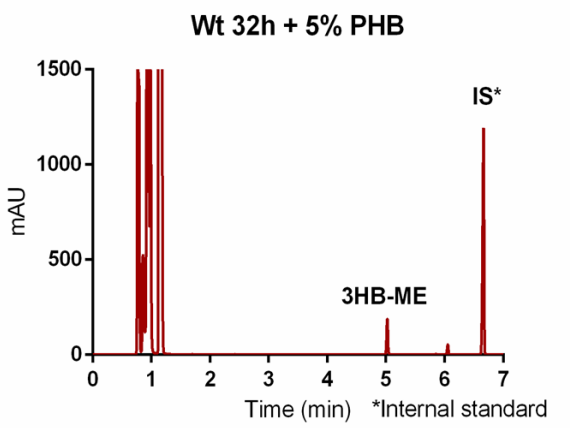

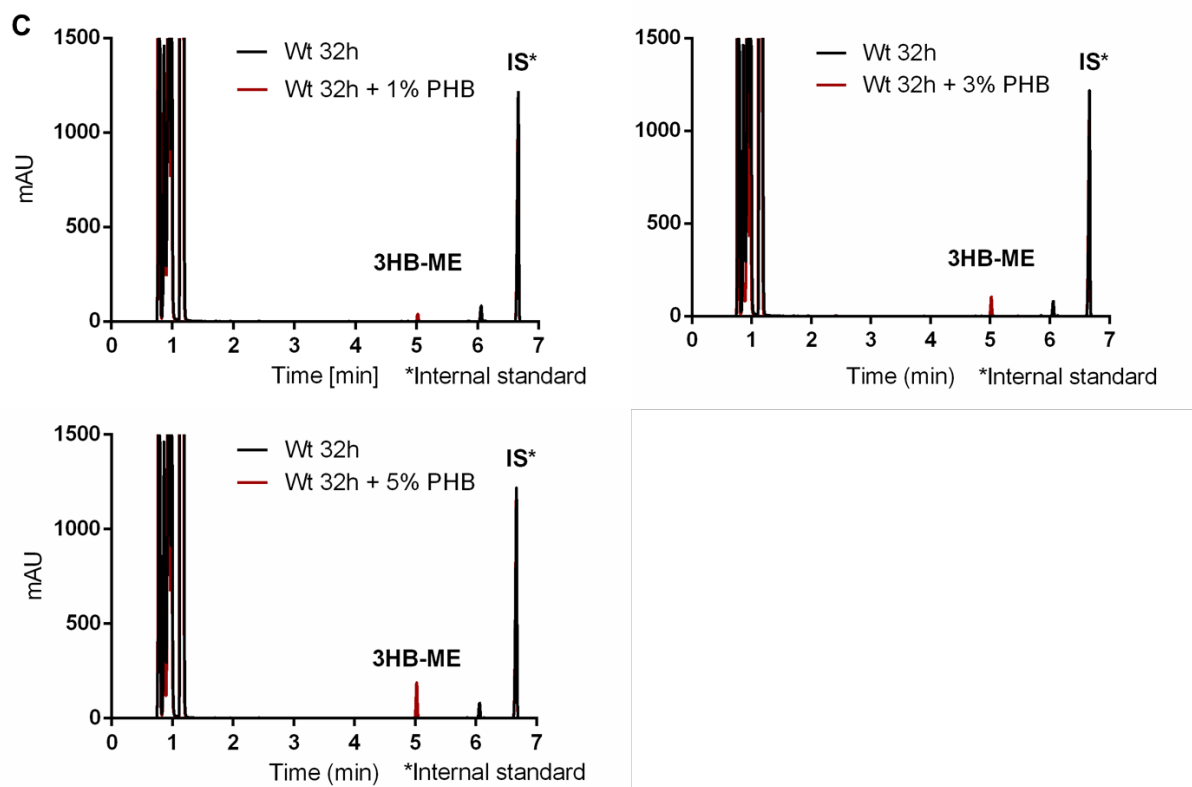

**Suppl. materials, Fig. 4: PHB determination in samples from *A. tumefaciens* wild type by gas chromatography after acidic methanolysis.** Chromatograms of samples taken after 12h, 24h, 32h and 48h show the absence of 3-hydroxybutyrate methylester (3HB-ME) (A). The chromatograms of the 32 h sample were spiked with 1, 3 or 5% of 3HB-ME of the cell dry weight to estimate the detection limit (B). The presence of 1% 3HB-ME (PHB) could be well detected as shown in the enlarged inlay figure. The overlay of the 32h time point sample in (A) with the spiked samples of (B) are shown in (C). IS\* refers to the internal standard (methyl-benzoate).

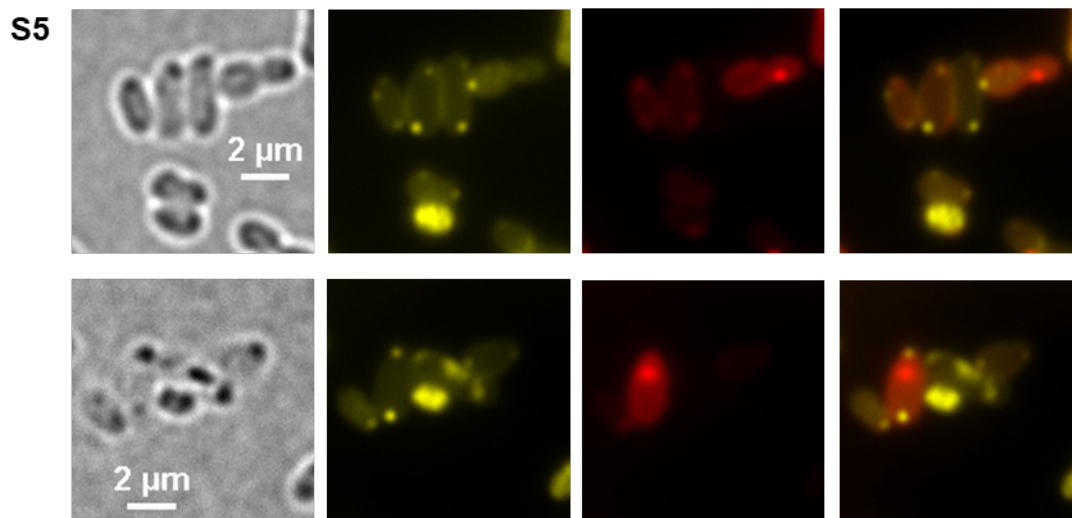

**Suppl. materials Fig. 5: Fluorescence microscopy of *A. tumefaciens*.** *A. tumefaciens* wild type was stained with DAPI and MitoTracker. DAPI-PolyP and MitoTracker foci occurred in close proximity in the cells, but no co-localisation was observed. From left to right: bright field, DAPI-polyP, MitoTracker, merge.

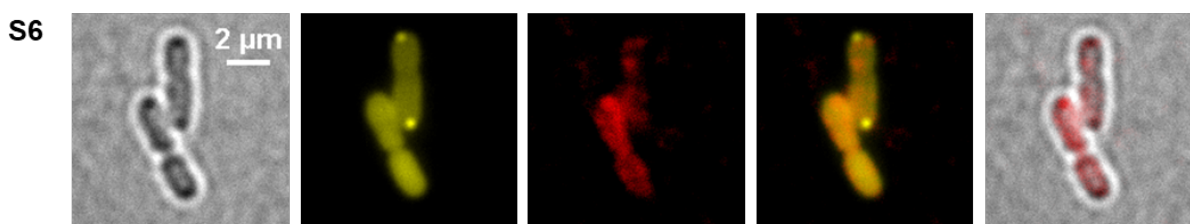

**Suppl. materials Fig. 6: Fluorescence microscopy of *A. tumefaciens* with DAPI and LysoTracker red DND-99.** With LysoTracker the cells show an irregular staining. From left to right: bright field, DAPI-polyP, LysoTracker, merge.

**Suppl. materials, movie S7 AB:** Time lapse experiment of *A. tumefaciens* harboring the pBBR1MCS2- $P_{phaC}$ -*eyfp-hppA* plasmid. Bright field (**A**) and eYFP-HppA (**B**) channel show cell growth and the formation/localization of the eYFP-HppA fluorescence signal, respectively.

S8

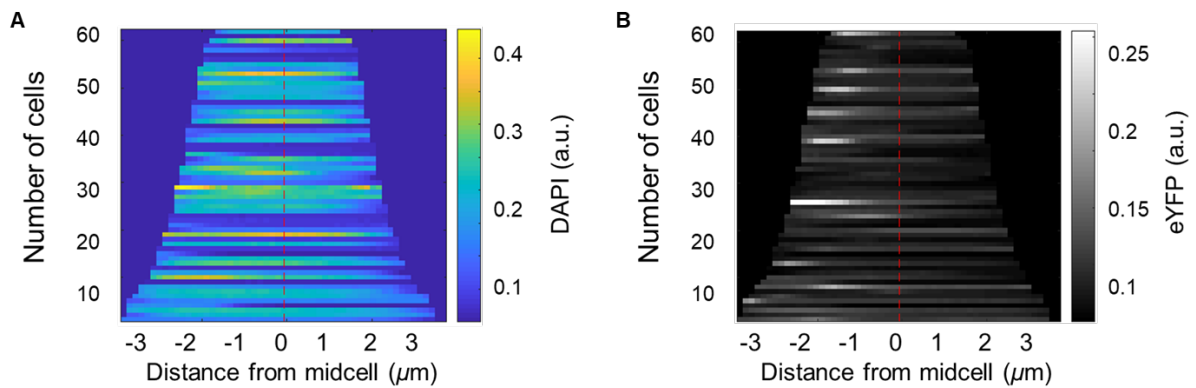

**Suppl. materials Fig. 8: Detection of DAPI-polyP and eYFP-HppA foci in *A. tumefaciens*.** The demographs show the distribution of the DAPI-polyP (A) and eYFP-HppA (B) signals for *A. tumefaciens* after 24h of growth on LB medium.

S9

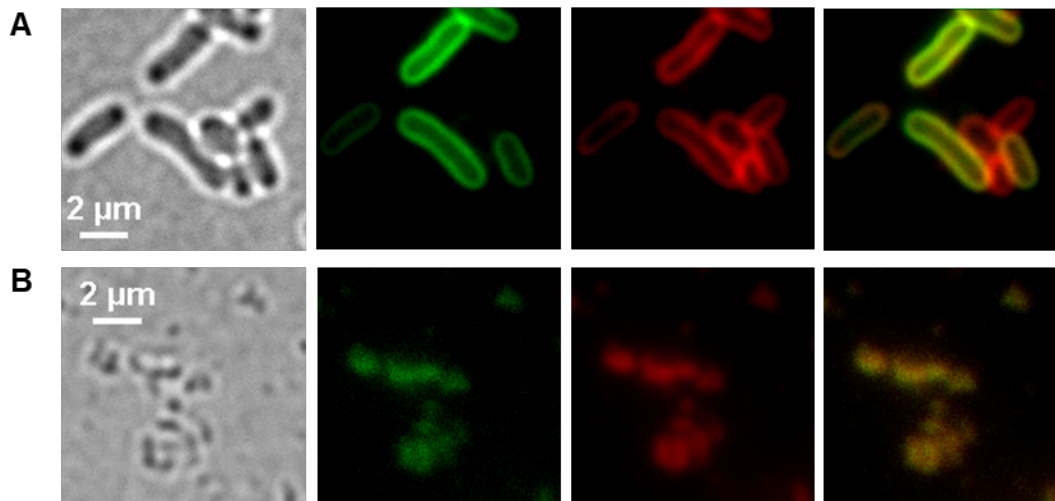

**Suppl. materials Fig. 9: Images of *A. tumefaciens* cells stained with FM dyes and of commercial fluorescent nanobeads.** *A. tumefaciens* cells were stained with FM 1-43 and FM 4-64 (A). Note the absence of any misalignment of the green and red fluorescence signals. From left to right: bright field, MF1-43, FM4-64, merge. The images in (B) show nanobeads (90nm) after sonification. The beads still present mainly as agglomerates of different sizes. In no case could a misalignment of the signal at different wavelength be observed.

S10

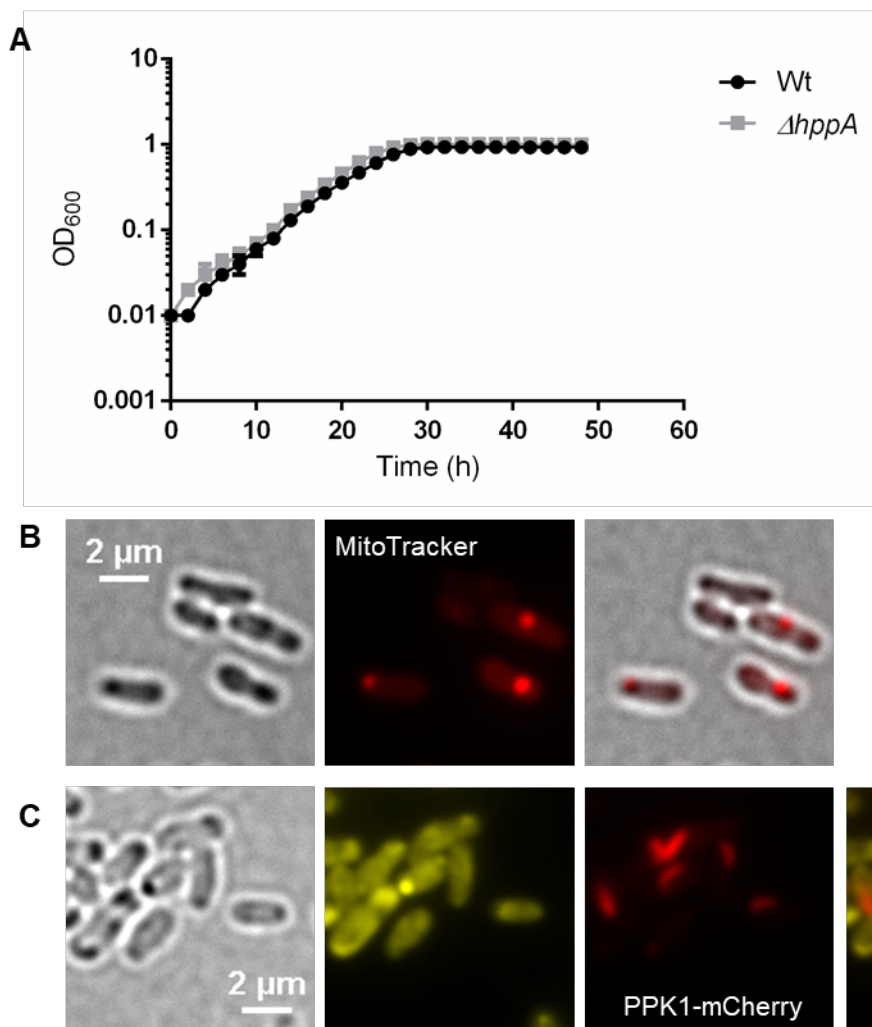

**Suppl. materials Fig. 10: Growth of *A. tumefaciens* in ATGN Medium.** *A. tumefaciens* wild type and the  $\Delta hppA$  mutant were grown in ATGN medium at 30°C in an Biotek microplate reader under continuous orbital shaking (282 cpm) (**A**). Turbidity (OD<sub>600</sub>) was determined in regular intervals. Error bars show standard deviation of eight biological replicates.

Fluorescence microscopic images of *A. tumefaciens*  $\Delta hppA$  mutant after staining with MitoTracker still showed the presence of fluorescent foci as the wild type (**Fig. 4** of the main publication) (**B**). From left to right: bright field, MitoTracker, merge.

Fluorescence microscopic images of *A. tumefaciens*  $\Delta hppA$  harboring pBBR1MCS2- $P_{phaC}$ -*ppk1-mcherry* (**C**) showed the formation of rod-shaped PPK1-mCherry signals which appeared close to the cell pole and in close proximity to the DAPI-polyP signal in cells with DAPI-polyP granules (compare with **Fig. 8** of the main publication). From left to right: bright field, DAPI-polyP, PPK1-mCherry, merge.
